# Supplementary material for: Assessing variability and uncertainty in orthopedic randomized controlled trials
Source: Acta Orthop. 2020 Apr 22;91(4):479–84. doi: 10.1080/17453674.2020.1755932 (PMC8023899; doi:10.1080/17453674.2020.1755932)
Supplement: Supplemental Material [file IORT_A_1755932_SM6468.pdf]

## Supplementary data

### Appendix

| Variable in result                                                         | Coding                                                                                                                                                                                                               |
|----------------------------------------------------------------------------|----------------------------------------------------------------------------------------------------------------------------------------------------------------------------------------------------------------------|
| id                                                                         | Name of the first author                                                                                                                                                                                             |
| journal                                                                    | Journal abbreviation                                                                                                                                                                                                 |
| group1                                                                     | Number of patients in study group 1 in last followup                                                                                                                                                                 |
| group2                                                                     | Number of patients in study group 2 in last followup                                                                                                                                                                 |
| power                                                                      | Power calculation reported (0 = no; 1 = yes)                                                                                                                                                                         |
| beta                                                                       | beta error rate reported, e.g. For 80% power, beta is 1–0.8 = 0.2                                                                                                                                                    |
| alfa                                                                       | alfa error rate reported for power calculation, e.g. 5% = 0.05                                                                                                                                                       |
| es                                                                         | Power outcome variable (cont=continuous, bin=binary, ni=noninferiority design, several=multiple power outcomes, generic=only standardized effect size reported)                                                      |
| Outcome classification based on computed or reported CI of mean difference | Based on reported confidence interval (CI) of observed mean difference (MD) in study. Statistically significant $p < 0.05$ = “pos” and statistically not significant $p > 0.05$ = “neg”                              |
| Follow-up time point for results                                           | Follow-up time point if available for study results. The pre-specified follow-up time point was utilized or the latest follow-up time point                                                                          |
| Power outcome                                                              | Name of the power outcome, abbreviations used for PROMs                                                                                                                                                              |
| SD estimate                                                                | SD estimate in power calculation                                                                                                                                                                                     |
| MD estimate                                                                | MD estimate in power calculation                                                                                                                                                                                     |
| Effect size of power calculation                                           | Effect size estimated in power calculation if SDest and MDest both reported                                                                                                                                          |
| SD assessed                                                                | Some SD parameter accessible for power outcome from text or table (SD, SE, CI). “nr” = not reported                                                                                                                  |
| N1                                                                         | Number of patients in study group 1 in the pre-specified or the last follow-up                                                                                                                                       |
| N2                                                                         | Number of patients in study group 2 in the pre-specified or the last follow-up                                                                                                                                       |
| N total of trial                                                           | Total number of patients in study groups in the pre-specified or the last follow-up                                                                                                                                  |
| Mean1                                                                      | Mean of study group 1 for power outcome                                                                                                                                                                              |
| Mean2                                                                      | Mean of study group 2 for power outcome                                                                                                                                                                              |
| SD1 outcome                                                                | SD observed for study group 1. Calculated from SE or CI when not available                                                                                                                                           |
| SD2 outcome                                                                | SD observed for study group 2. Calculated from SE or CI when not available                                                                                                                                           |
| SD1/SDest                                                                  | Ratio of SD observed and SD estimated for study group 1                                                                                                                                                              |
| SD2/SDest                                                                  | Ratio of SD observed and SD estimated for study group 2                                                                                                                                                              |
| Ln SD1/SDest                                                               | Natural logarithm of SD1/SDest ratio                                                                                                                                                                                 |
| Ln SD2/SDest                                                               | Natural logarithm of SD2/SDest ratio                                                                                                                                                                                 |
| SE1                                                                        | Standard error (SE) for study group 1. Calculated from CI of mean for study group 1 if not available                                                                                                                 |
| SE2                                                                        | Standard error (SE) for study group 2. Calculated from CI of mean for study group 2 if not available                                                                                                                 |
| SDrep                                                                      | SD observed for total in study for power outcome. Calculated from SD1 and SD2 if not available. If study groups had no SD/SE/CI then total SD observed was calculated from CI of mean difference for primary outcome |
| t-value (95%)                                                              | t-value from t-distribution for 95% interval                                                                                                                                                                         |
| CI low point, reported                                                     | Low point of CI of MD for primary outcome if reported                                                                                                                                                                |
| CI up-point, reported                                                      | High point of CI of MD for primary outcome if reported                                                                                                                                                               |
| CI of MD in text/table                                                     | Yes if CI of MD for primary outcome reported in text or table                                                                                                                                                        |
| CI of Means in text/table                                                  | Yes if CI of means of study groups for primary outcome reported in text or table                                                                                                                                     |
| SDobs / SDest                                                              | Ratio of SD observed in study and SD estimated in power calculation                                                                                                                                                  |
| Ln Sdobs/SDest                                                             | Natural logarithm of ratio of SD observed and SD estimated                                                                                                                                                           |
| CI low point, calculated                                                   | CI high point calculated for uncommon SD in study groups                                                                                                                                                             |
| CI up-point, calculated                                                    | CI high point calculated for uncommon SD in study groups                                                                                                                                                             |
| MSE                                                                        | Mean standard error                                                                                                                                                                                                  |
| CI up                                                                      | CI high point calculated for common SD in study groups                                                                                                                                                               |
| CI low                                                                     | CI high point calculated for common SD in study groups                                                                                                                                                               |
| CI up final, CI low final                                                  | If CI of MD was reported in study, these estimates were preferred. If CI of MD was calculated, uncommon SD calculation for CI of MD was preferred                                                                    |
| CI max                                                                     | Absolute maximum point of CI of MD interval, positive or negative number                                                                                                                                             |
| MDest not included                                                         | MD estimate in power calculation inclusion to CI of MD. (0 = included and 1 = not included)                                                                                                                          |
| Reason no N_SD                                                             | Reason provided for SD of power outcome not accessible.                                                                                                                                                              |
| ES MD not included                                                         | Effect size estimated in power calculation if MD estimate was not included in CI of MD                                                                                                                               |
| ES MD included                                                             | Effect size estimated in power calculation if MD estimate was included in CI of MD                                                                                                                                   |
| ES MD not included NEG                                                     | Effect size estimated in power calculation if MD estimate was not included in CI of MD. In “negative” studies only                                                                                                   |
| ES MD included NEG                                                         | Effect size estimated in power calculation if MD estimate was included in CI of MD. In “negative” studies only                                                                                                       |
| SS MD not included neg                                                     | Sample size of study in the pre-specified or last follow-up if MD estimate was not included in CI of MD. In “negative” studies only                                                                                  |
| SS MD included neg                                                         | Sample size of study in the pre-specified or last follow-up if MD estimate was included in CI of MD. In “negative” studies only                                                                                      |
